# Supplementary material for: Disparity between High Satisfaction and Severe Pain in Patients after Caesarean Section: A Prospective Observational-Controlled Investigation
Source: Hindawi journal article supplement (doi:10.1155/2018/2634768), 2018-01-01
Supplement: f1 [file 2634768.f1.pdf]

**Supplementary table.**

|                                   | <b>CS (N=64)</b> | <b>Other surgeries (N=63)</b> | <b><i>P</i></b> |
|-----------------------------------|------------------|-------------------------------|-----------------|
| Pain intensity (VRS-11)           |                  |                               |                 |
| maximal pain                      | 6.1 (2.1)        | 6.0 (2.7)                     | 0.82            |
| minimal pain                      | 1.9 (1.7)        | 2.1 (1.6)                     | 0.49            |
| on movement                       | 6.2 (2.0)        | 3.6 (1.9)                     | <0.0001         |
| on discharge from the ward        | 2.1 (1.6)        | 1.8 (1.1)                     | 0.22            |
| Satisfaction with therapy (VRS-5) | 1.4 (0.7)        | 1.7 (0.7)                     | 0.017           |
| Pain disturbed:                   |                  |                               |                 |
| general activity*                 | 92 (62)          | 50 (84)                       | 0.16            |
| mood*                             | 45 (29)          | 38 (22)                       | 0.5             |
| sleep*                            | 65 (42)          | 67 (42)                       | 0.71            |
| enjoyment of life*                | 43 (27)          | 43 (23)                       | 0.97            |

Data presented as mean (SD) or as \* per cent (absolute number of patients); CS – caesarean section; VRS - Verbal Rating Scale (explanation in text)
